# Supplementary material for: Policy and process for returning raw genomic data to parents and young adult participants in a pediatric cancer precision medicine trial.
Source: Research Square preprint supplement (doi:10.21203/rs.3.rs-4356870/v1), 2024-06-12
Supplement: Supplementary file 1 [file 0627d5ec34b14c2318be3747.docx]

Table 2. Consensus scores for clarity and relevance for statements, outcomes and actions Rounds 1 and 2. Percentage scores for strongly agree & agree for the original/amended statement in terms of clarity (C) and relevance (R) in Rounds 1 & 2, outcomes (O) & number of experts who provided comments in the free text boxes.

| **Headings and statements** | **Round 1** | **Round 2** |
| --- | --- | --- |
| **Part 1 – the Policy** | | |
| **Scope:** Definition of raw genomic data and biospecimens | C: 100%; R:95%; O: Wording edits (n=7) | C: 93%; R:95%; O: Consensus |
| That separate biospecimens policy should be developed | C: 83%; R 82%; O: wording edits (n=3) | C: 100%; R 100%; O: Consensus |
| **Premises underpinning the policy:** Recognition that the biospecimens and generated raw data belongs to each participant; Cultural issues; Raw data has no clinical value in the absence of further analysis. | C: 83%; R:89%; O: Wording edits (n=5) | C: 93%; R:95%; O: Consensus |
| **Background:** Reference to the literature in regard to the international view and Australian setting | C:72%; R:89%; O: Wording edits (n=9); additional references | C:93%; R:95%; O: Consensus |
| **Ethical considerations**: Respect for autonomy, beneficence/clinical utility, minimizing the potential for harm, reciprocity and responsibility to genetic relatives | C:83%; R:89%; O: Wording edits (n=11); add child best interest to autonomy; minimizing potential for harm should be maleficence | C:86%; R:89%; O: Consensus |
| **Applying the policy** | C:81%; R:94%; O: Wording edits (n=3); | C:86%; R:94%; O: Wording edits (n=3) |
| Groups for whom the process applies | C:64%; R:64%; O: Wording edits (n=10); Process only for parents/guardians/YA participants | C:100%; R:100%; O: Consensus |
| **Part 2 – the Process** | | |
| **Information in the Patient information Sheet and Consent** | C:62%; R:60%; O: Wording edits (n=5); not in consent form | C:86%; R:90%; O: Consensus |
| **Step (1)**.Treating clinician or the parent/guardian/AY participant notifies the ZERO2 Program Management Team of the request. **(2**).Meeting (online or in person) with Study team member. Leaflet outlining the issues guide the discussion: | C:82%; R:82%; O: Wording edits (n=5) | C:86%; R:86%; O: Wording edits (n-2) |
| **Steps: (3) & (4)** Meeting summary, application form provided if proceeding to ZERO2 Program Management Team who sends to the Data Access Review Committee; if decline, provide reasons **(5) & (6)** Study leads, HREC, & CCI legal notified and ratify; upload to child/YA’s electronic medical record. | C:70%; R:82%; O: Wording edits (n=8); Process needs to be streamlined; should not decline | C:93%; R:100%; O: Consensus |
| **(7)** Consent form signed (delineates risks, no warranty for accuracy or obligation to act on findings); **(8)** provide data in a standard form free of charge | C:82%; R:76%; O: Wording edits (n=4) | C:86%; R:93%; O: Wording edits (n=2) |
