# Supplementary material for: Policy and process for returning raw genomic data to parents and young adult participants in a pediatric cancer precision medicine trial.
Source: Research Square preprint supplement (doi:10.21203/rs.3.rs-4356870/v1), 2024-06-12
Supplement: Supplementary file 2 [file 13a94f36a9677a858171e5ed.docx]

Table 3 (b) Summary points on the return of biospecimens donated to and raw genomic data generated from the National Clinical Trials, PRISM and ZERO2 to parents/participants on request: Part 2 APPLYING THE POLICY Requests for return of raw genomic data will be received from parents/participants. There may be many reasons for such requests underpinned by a range of complexities. This policy assumes a default provision of biospecimens and/or raw genomic data when a request is made. All requests for return of biospecimens and/or raw genomic data (whether made by parents/participants or the clinician) will be considered by the Data Access Committee (DAC) of ZERO2 (comprising clinicians, scientists and other health care professionals) and the participant’s enrolled healthcare provider. The aim of such review is to oversee the operation of this policy.

| **1. The process & Step 1** | **2. Steps 2-4** | **3. Steps 5-6** | **4. Steps 7-9** |
| --- | --- | --- | --- |
| - The ZERO2 Patient Information Sheet (PIS) and consent form states that following the issuing of the reports of the analysed genomic data, a process for return of biospecimens and raw genomic data to the parent/participant is in place and that requests should be discussed with their treating clinician **or** the site ZERO2 Study team.   1. This Policy and Process document will be provided to all enrolled healthcare providers who can then provide it where an enquiry is made regarding return of the biospecimen(s) and/or raw genomic data. The healthcare provider or the participant/parent/ guardian on behalf of the child participant notifies the site ZERO2 Study team using the contact details on the study consent form. | 2. As soon as possible after a request is received, they are offered a meeting (by telephone or online) with the study genetic counsellor. They can request for their clinician to attend. The meeting is to gain an understanding of the basis for their request; to understand and document how they wish or intend to use the biospecimens and/or raw genomic data; and to consider how the request may best be facilitated. The role of the study genetic counsellor is to ensure all views are heard and considered. Prior to the meeting, a leaflet outlining the issues to be discussed will be provided (emailed or hard copy) to guide the discussion. The issues are those outlined in Part 1.  3. A summary of the meeting is provided to the participant/parent /guardian and to the clinician by the study genetic counsellor.  4. If after review, they still wish to make the request, they complete the application/consent form which includes acknowledgement of their understanding of the potential benefits and risks. | 5. The release raw genomic data consent form delineates that the data is research purposes and should not be used for clinical interpretation or decision- making without medical advice; confirmatory testing in a NATA accredited laboratory is recommended prior to reliance on the data for clinical purposes; no warranty of data accuracy and ZERO2 are not liable for harm caused from analysis or other use of the data; no obligation on the treating clinician to act on any therapeutic recommendations arising from analysis by a third party; responsibility by them is accepted for subsequent uses of the data; and the ease of identifiability of genomic data is understood.  6. For the return of biospecimens, the type and availability of the samples will guide the discussion. Also, when enrolling in ZERO2, consent may have been given to storage of the samples for future research. The discussion will therefore address whether all samples will be returned or whether some will be retained by the research group. | 7. The site ZERO2 Program Management Team receipts the completed application/consent and circulates it to the ZERO’s DAC. All communications will come out of the ZERO@ccia.org.au shared mailbox.  8. When the signed consent form is received by the DAC, arrangements will be made to transfer the biospecimens and/or raw genomic data as soon as possible. The data will be provided as a FASTQ file(s) that enables the ability to reconstruct the individual’s genome, transferred using an appropriate delivery mode for data tracking and security processes. The data will be accompanied by the consent form signed by the site ZERO2 Program Management Team leader and the parent/guardian/participant.  9. Notification of the release is sent to the site ZERO2 Program Management Team who will report annually on the requests to the ZERO2 research management committee. All documentation will be stored in the child/young person’s electronic medical record. |
