# Supplementary material for: Policy and process for returning raw genomic data to parents and young adult participants in a pediatric cancer precision medicine trial.
Source: Research Square preprint supplement (doi:10.21203/rs.3.rs-4356870/v1), 2024-06-12
Supplement: Supplementary file 3 [file 2467a41e175db2350de0fa5e.docx]

Table 3 (a) Summary points on the return of biospecimens donated to and raw genomic data generated from the National Clinical Trials, PRISM and ZERO2 to parents/participants on request: Part 1 POLICY FOR RETURN.

**Purpose**

It is recognized that while the ZERO2 research team conducting the trials are custodians of the biospecimens and the raw genomic data generated, parents/participants have an interest in accessing both the biospecimen and the raw genomic data after receiving the report of the research findings of both the tumour and non-cancerous samples. Raw genomic data on its own cannot inform clinical decision-making nor answer questions in a research setting, but its subsequent analysis and interpretation may have great value.

| **1. Scope** | **2. Assumptions** | **3. Background** | **4. Ethical Considerations** |
| --- | --- | --- | --- |
| - *Biospecimens* are defined as tissue removed from the participant, including both tumour and non-tumour tissue. The tissue may be in one or more of several forms: fresh human tissue, fresh frozen tissue, formalin fixed tissue (prior to processing), formalin fixed paraffin embedded tissue, nucleic acid (DNA or RNA) isolated from tissue (such as blood or skin) or collected (such as urine). - *Raw genomic data* is obtained from the genomic sequencing of a biospecimen and is genomic sequence reads without annotation or interpretation in the form of a FASTQ file(s). | - Timing of the interpreted report aim: 4 wks (initial) - 8 wks (germline) to be shared without delay. - If the parents/participant requests biospecimens and/or raw genomic data to be returned without delay, (see Part 2). - Cultural understanding of genomic data is respected, including of those who identify as Aboriginal and/or Torres Strait Island, Māori or other indigenous peoples. if the participant or parent/guardian (and/or their families), so directs, a dialogue and collaboration with leaders of the relevant indigenous people with whom they identify, should form part of the process to return of the biospecimens and raw genomic data. | - Ethical complexity and diverse perspectives - Recognised concerns, such as the utility of the data itself, the potential for harm arising from third party interpretation and the possibility of unnecessary interventions based on such information but increasing support. - Guidelines and recommendations have been produced. | - *Respect for autonomy* of participants, personal meaning and value from genomics but the autonomy of the child also needs to be considered so that any potential outcome of the return is in line with ‘the best interests of the child’. - *Beneficence* in that there are potential benefits, including the option for further use and interpretation, to altruistically upload the child’s data to an online portal for data sharing purposes for greater benefit and may also be of particular significance in the case of a deceased child. - *Non-maleficence* includes awareness of risk to a child’s privacy; misinterpretation of the data by external researchers/clinicians or third-party interpretative services; potential for a cascade of (possibly unnecessary) health interventions following a re-interpretation; future potential genetic discrimination such as from life insurers; and the identification of a drug treatment not available in Australia. The proposed process aims to mitigate these potential harms. - *Reciprocity* for contribution to the research means their genomic data and/or biospecimen should be returned to research participants who request it. - *Responsibility T*he recipient has to take responsibility for the future use. Of the raw data and/or biospecimens. If interpretation of the raw data reveals medically actionable findings, this has potential implications for the participants’ genetic relatives, giving rise to a moral obligation to consider their right to know/ not to know, which may not be mediated with the expertise of healthcare professionals. |
