# Supplementary material for: Policy and process for returning raw genomic data to parents and young adult participants in a pediatric cancer precision medicine trial.
Source: Research Square preprint supplement (doi:10.21203/rs.3.rs-4356870/v1), 2024-06-12
Supplement: Supplementary file 4 [file 9dbdab97b76625fb1fa7b66f.docx]

Table 1. Delphi expert panel participants in Rounds 1 and/or 2

| Field of expertise | Experts’ participation (n=21/54; 39%) | Years practiced in field (range) |
| --- | --- | --- |
| Pediatric oncology/hematology | 8/22; 36% | 7-15 |
| Clinical genetics/ genetic counselling | 7/8; 78% | 3-30 |
| Genomics/computational biology | 2/4; 50% | >20 |
| Health law | 2/3; 67% | 25 |
| Bioethics | 1/2; 50% | >20 |
| ZERO Program management | 1/9; 11% | >20 |
| Psychologists | 0/2 | na |
| Clinical scientists | 0/4 | na |
